# Supplementary material for: Use of tramadol and the risk of bleeding complications in patients on oral anticoagulants: a systematic review and meta-analysis
Source: Springer Nature journal article supplement (doi:10.1007/s00228-022-03411-1), 2022-11-03
Supplement: MOESM4 [file 228_2022_3411_MOESM4_ESM.pdf]

## Supplemental Material

### Use of tramadol and the risk of bleeding complications in patients on oral anticoagulants: A restricted review and meta-analysis

European Journal of Clinical Pharmacology

Clara Lévy, Laëtitia Gosselin, Ana-Maria Vilcu, Olivier Steichen

#### Corresponding author:

Olivier Steichen

Affiliations: Sorbonne Université, INSERM, Institut Pierre Louis d'Epidémiologie et de Santé Publique, équipe Sentinelles, Assistance Publique-Hôpitaux de Paris (AP-HP), Hôpital Tenon, service de médecine interne, F75012, Paris, France

Email: [olivier.steichen@aphp.fr](mailto:olivier.steichen@aphp.fr)

|                                                                                                                                                |    |
|------------------------------------------------------------------------------------------------------------------------------------------------|----|
| <b>Supplementary Table 1</b> Search strategies by database .....                                                                               | 2  |
| <b>Supplementary Table 2</b> Characteristics of included case reports and case series .....                                                    | 3  |
| <b>Supplementary File 1</b> Risk of bias assessment of case reports and case series, adapted from the Drug Interaction Probability Scale ..... | 9  |
| <b>Supplementary Table 3</b> Risk of bias assessment of included case reports and case series .....                                            | 10 |
| <b>Supplementary File 2</b> Newcastle-Ottawa quality assessment scale used for risk of bias assessment of case-control studies.....            | 12 |
| <b>Supplementary Table 4</b> Risk of bias assessment of included case-control studies.....                                                     | 13 |
| <b>Supplementary File 3</b> Newcastle-Ottawa quality assessment scale used for risk of bias assessment of cohort studies .....                 | 14 |
| <b>Supplementary Table 5</b> Risk of bias assessment of included cohort studies .....                                                          | 15 |

**Supplementary Table 1** Search strategies by database

---

**Pubmed (<https://pubmed.ncbi.nlm.nih.gov/>)**

---

Tramadol AND (Anticoagulants OR Acenocoumarol OR dicoumarol OR ethyl biscoumacetate OR phenprocoumon OR warfarin OR coumarin OR apixaban OR argatroban OR betrixaban OR eribaxaban OR otamixaban OR razaxaban OR rivaroxaban OR xabans OR dabigatran OR ximelagatran OR melagatran OR efegatran OR flovagatran OR inogatran OR napsagatran OR Vitamin K antagonists OR novel oral anticoagulants OR direct oral anticoagulants OR direct thrombin inhibitors OR factor Xa inhibitors OR VKA OR NOAC OR DOAC)

---

**Embase (<https://www.embase.com/search/>)**

---

Tramadol[ti,ab,kw] AND (Anticoagulants OR "anticoagulant agent" OR Acenocoumarol OR dicoumarol OR "ethyl biscoumacetate" OR phenprocoumon OR warfarin OR coumarin OR apixaban OR argatroban OR betrixaban OR eribaxaban OR otamixaban OR razaxaban OR rivaroxaban OR xabans OR dabigatran OR ximelagatran OR melagatran OR efegatran OR flovagatran OR inogatran OR napsagatran OR "Vitamin K antagonists" OR "novel oral anticoagulants" OR "direct oral anticoagulants" OR "direct thrombin inhibitors" OR "oral factor Xa inhibitors" OR VKA OR NOAC OR DOAC) AND bleeding

---

**Supplementary Table 2** Characteristics of included case reports and case series

| Author (year)                                        | Study design | Number of cases                                                | Patient demographics |              |                                                                             |                                      | Anticoagulant regimen            | Tramadol regimen |
|------------------------------------------------------|--------------|----------------------------------------------------------------|----------------------|--------------|-----------------------------------------------------------------------------|--------------------------------------|----------------------------------|------------------|
|                                                      |              |                                                                | Age (years)          | Sex          | Comorbidities                                                               | Condition leading to tramadol intake |                                  |                  |
| Abadie et al (2013) [1]                              | Case series  | 13 (+ 2 with INR increase without bleeding)                    | 71.6 (mean)          | 47% women    | Not reported                                                                | Not reported                         | VKAs                             | Not reported     |
| Adverse Drug Reactions Advisory Committee (2004) [2] | Case reports | 2 (reported along 9 cases with INR elevation without bleeding) | 76 and 88            | Not reported | Not reported                                                                | Not reported                         | Warfarin                         | Not reported     |
| Bouvy (1998) [3]                                     | Case reports | 1                                                              | 88                   | Woman        | Not reported                                                                | Not reported                         | Acenocoumarol                    | 50 mg bid        |
|                                                      |              | 1                                                              | 75                   | Woman        | Not reported                                                                | Hip pain                             | Acenocoumarol                    | Not reported     |
| Chiffolleau et al (2003) [4]                         | Case reports | 2                                                              | 77 and 86            | Not reported | Not reported                                                                | Not reported                         | Fluindione                       | Not reported     |
| Dong et al (2014) [5]                                | Case report  | 1                                                              | 75                   | Woman        | Paroxysmal atrial fibrillation<br>Hypertension<br>Diabetes mellitus type II | Osteoarthritis                       | Warfarin for atrial fibrillation | 200 mg bid       |

**Supplementary Table 2 (continued)**

| Author (year)                                        | Concomitant medication(s)                                                                                                                                                                                                        | Time to bleeding event                                                                                | Bleeding complications           | INR value        |                                                                                                                                  |
|------------------------------------------------------|----------------------------------------------------------------------------------------------------------------------------------------------------------------------------------------------------------------------------------|-------------------------------------------------------------------------------------------------------|----------------------------------|------------------|----------------------------------------------------------------------------------------------------------------------------------|
|                                                      |                                                                                                                                                                                                                                  |                                                                                                       |                                  | at admission     | after tramadol or anticoagulant discontinuation                                                                                  |
| Abadie et al (2013) [1]                              | Not reported                                                                                                                                                                                                                     | Mean 5.9 days (SD 7,4)                                                                                | Not reported                     | Not reported     | Not reported                                                                                                                     |
| Adverse Drug Reactions Advisory Committee (2004) [2] | Not reported                                                                                                                                                                                                                     | In 11 patients with elevated INR or bleeding, median 4 days (range 3 to 7) except one case at 6 weeks | Death due to haemorrhagic stroke | 5 in one case    | Five reports describe rapid recovery within 1-4 days of withdrawal of tramadol with or without reduction in the dose of warfarin |
| Bouvy (1998) [3]                                     | Carbasalate calcium 38 mg/day<br>Omeprazole 20 mg/day<br>Furosemide 40 mg/day                                                                                                                                                    | "Few days"                                                                                            | Nosebleed                        | High             | Within therapeutic range                                                                                                         |
|                                                      | Strumazol 10 mg bid<br>Famotidine 20 mg bid<br>Digoxin 0.25 mg/day<br>Sertraline 50 mg bid<br>Atenolol 100 mg/day<br>Temazepam 20 mg bid<br>Lactilol 5 g/day<br>Glibenclamide 5 mg tid<br>Paracetamol 500 mg once or twice a day | 2 days                                                                                                | Hematoma                         | > 7              | Not reported                                                                                                                     |
| Chiffolleau et al (2003) [4]                         | Not reported                                                                                                                                                                                                                     | "At tramadol introduction"                                                                            | Hematoma                         | 5.48 in one case | Not reported                                                                                                                     |
| Dong et al (2014) [5]                                | Amiodarone 200 mg/day<br>Metoprolol 71.25 mg/day<br>Fosinopril 10 mg/day<br>Novolin 30R<br>6 IU before meals                                                                                                                     | 3 days                                                                                                | Hematuria, ecchymosis            | 10.04            | Within therapeutic range                                                                                                         |

Supplementary Table 2 (continued)

| Author (year)              | Study design | Number of cases                                           | Patient demographics    |              |                                                                |                                      | Anticoagulant regimen                              | Tramadol regimen |
|----------------------------|--------------|-----------------------------------------------------------|-------------------------|--------------|----------------------------------------------------------------|--------------------------------------|----------------------------------------------------|------------------|
|                            |              |                                                           | Age (years)             | Sex          | Comorbidities                                                  | Condition leading to tramadol intake |                                                    |                  |
| Hedenmalm et al (2004) [6] | Case reports | 1                                                         | 74                      | Man          | Not reported                                                   | Not reported                         | Warfarin                                           | 400 mg/day       |
|                            |              | 1                                                         | 64                      | Man          | Not reported                                                   | Not reported                         | Warfarin                                           | 400 mg/day       |
|                            |              | 1                                                         | 58                      | Woman        | Not reported                                                   | Not reported                         | Warfarin                                           | 50 mg/day        |
|                            |              | 3 patients without genotyping for cytochrome polymorphism | Between 58 and 89 years | Not reported | Not reported                                                   | Not reported                         | Warfarin                                           | 50 to 400 mg/day |
| Jensen (1997) [7]          | Case report  | 1                                                         | 84                      | Woman        | Parkinson's disease                                            | Not reported                         | Warfarin for pulmonary embolism                    | 50 mg tid        |
| Madsen et al (2004) [8]    | Case report  | 1                                                         | 54                      | Woman        | None                                                           | Low back pain                        | Phenprocoumon for suspected deep venous thrombosis | 50–100 mg qid    |
| Sabbe et al (1998) [9]     | Case report  | 1                                                         | 61                      | Woman        | Cerebrovascular accident<br>Seizure disorder<br>Hypothyroidism | Musculoskeletal pain                 | Warfarin for mitral valve replacement              | 50 mg qid        |

**Supplementary Table 2 (continued)**

| Author (year)              | Concomitant medication(s)                                                                                                        | Time to bleeding event                           | Bleeding complications    | INR value    |                                                 |
|----------------------------|----------------------------------------------------------------------------------------------------------------------------------|--------------------------------------------------|---------------------------|--------------|-------------------------------------------------|
|                            |                                                                                                                                  |                                                  |                           | at admission | after tramadol or anticoagulant discontinuation |
| Hedenmalm et al (2004) [6] | Digoxin, Furosemide, Prednisolone, Amiloride, Calcium carbonate, Zopiclon                                                        | Not specifically reported, but less than 60 days | Hematoma                  | Not reported | Not reported                                    |
|                            | Salmeterol, Budesonide, Digoxin, Furosemide, Spironolactone, Metoprolol, Cyclizine, Paracetamol, Diazepam, Omeprazole, Lactulose | Not specifically reported, but less than 60 days | Hematoma                  | Not reported | Not reported                                    |
|                            | Atorvastatin, Diltiazem, Losartan, Oestradiol, Norethisterone, Nitroglycerine, Fibers                                            | Not specifically reported, but less than 60 days | Vaginal bleeding          | Not reported | Not reported                                    |
|                            | Not reported for the 3 patients without genotyping                                                                               | Not specifically reported, but less than 60 days | Not reported              | Not reported | Not reported                                    |
| Jensen (1997) [7]          | Diuretics<br>Potassium supplements<br>Spironolactone<br>Levodopa/Benserazide                                                     | “Few days”                                       | Gastrointestinal bleeding | Not reported | Not reported                                    |
| Madsen et al (2004) [8]    | Paracetamol 1 g qid                                                                                                              | 6 days                                           | Nosebleed                 | 4.0          | Not applicable                                  |
| Sabbe et al (1998) [9]     | Digoxin 0,25 mg/day<br>Phenytoin 100 mg tid<br>Levothyroxine 100 µg/day<br>Folic acid 1 mg/day                                   | 15 days                                          | Arm ecchymosis            | 10.6         | Within therapeutic range                        |

Supplementary Table 2 (continued)

| Author (year)                 | Study design | Number of cases | Patient demographics |       |                                                                                                                                                                                                                    |                                      | Anticoagulant regimen                            | Tramadol regimen |
|-------------------------------|--------------|-----------------|----------------------|-------|--------------------------------------------------------------------------------------------------------------------------------------------------------------------------------------------------------------------|--------------------------------------|--------------------------------------------------|------------------|
|                               |              |                 | Age (years)          | Sex   | Comorbidities                                                                                                                                                                                                      | Condition leading to tramadol intake |                                                  |                  |
| Scher et al (1997) [10]       | Case report  | 1               | 76                   | Man   | Hypertension<br>Benign prostatic hypertrophy<br>Left bundle-branch block<br>Degenerative joint disease                                                                                                             | Neck arthritis                       | Warfarin for aortic valve replacement            | 50 mg tid        |
| Stöllberger et al (2017) [11] | Case report  | 1               | 75                   | Man   | Arterial hypertension<br>Coronary artery disease<br>Degenerative spondylopathy<br>Hyperuricemia<br>Paroxysmal atrial fibrillation<br>Coxarthrosis<br>Prostatic cancer<br>Diabetes mellitus type II<br>Gynecomastia | Chest pain                           | Dabigatran<br>150 mg bid for atrial fibrillation | 100 mg/day       |
| Vacher et al (2020) [12]      | Case report  | 1               | 80                   | Woman | Not reported                                                                                                                                                                                                       | Not reported                         | Fluindione                                       | Not reported     |
| Veltri et al (2019) [13]      | Case report  | 1               | 86                   | Woman | Chronic atrial fibrillation<br>Hypertension<br>Diverticulosis<br>Asthma                                                                                                                                            | Neuropathic pain                     | Warfarin for atrial fibrillation                 | Not reported     |

**Supplementary Table 2** (continued)

| Author (year)                 | Concomitant medication(s)                                                                                                                                                                                                                                                    | Time to bleeding event | Bleeding complications                                 | INR value      |                                                 |
|-------------------------------|------------------------------------------------------------------------------------------------------------------------------------------------------------------------------------------------------------------------------------------------------------------------------|------------------------|--------------------------------------------------------|----------------|-------------------------------------------------|
|                               |                                                                                                                                                                                                                                                                              |                        |                                                        | at admission   | after tramadol or anticoagulant discontinuation |
| Scher et al (1997) [10]       | Captopril 25 mg tid<br>Hydrochlorothiazide/<br>triamterene daily                                                                                                                                                                                                             | 24 days                | Blood blisters on toes                                 | 7.31           | 3.27                                            |
| Stöllberger et al (2017) [11] | Valsartan 160 mg/day<br>Amlodipine 5 mg/day<br>Nicorandil 20 mg/day<br>Furosemide 40 mg/day<br>Atorvastatin 80 mg/day<br>Bisoprolol 7.5 mg/day<br>Metformin 2000 mg/day<br>Tizanidine 2 mg/day<br>Pantoprazole 40 mg/day<br>Diclofenac and Naproxen up to four times per day | Unclear                | Melena due to hemorrhagic gastritis<br>Hemopericardium | Not applicable | Not applicable                                  |
| Vacher et al (2020) [12]      | Paracetamol                                                                                                                                                                                                                                                                  | 3 days                 | Fatal gastrointestinal bleeding                        | 10             | Not applicable                                  |
| Veltri et al (2019) [13]      | Not reported                                                                                                                                                                                                                                                                 | Not reported           | Rectal bleeding                                        | 5.4            | 1.9                                             |

*BID*, twice daily; *g*, grams; *INR*, international normalized ratio; *IU*, International Units; *mg*, milligrams; *QID*, four times daily; *QIW*, four times a week; *SD*, standard deviation; *TID*, three times daily; *TIW*, three times a week; *VKAs*, vitamin K antagonists



**Supplementary File 1** Risk of bias assessment of case reports and case series, adapted from the Drug Interaction Probability Scale

- 1) Did the event match a classical picture of bleeding complications in patients on oral anticoagulants?
- 2) Were other possible causes of the clinical picture ruled out?
- 3) Did the patient have a previous history of uneventful oral anticoagulants intake at the same dose?
- 4) Did the symptoms occur within 30 days after tramadol prescription?
- 5) Did the INR or the bleeding complications remit upon withdrawal of tramadol and/or oral anticoagulants?
- 6) In case of oral anticoagulants readministration without tramadol, did the patient remain free of complication?

**Supplementary Table 3** Risk of bias assessment of included case reports and case series

| Author (year)                                        | Did the event match a classical picture of bleeding complications in patients on oral anticoagulants? | Were other possible causes of the clinical picture ruled out? | Did the patient have a previous history of uneventful oral anticoagulants intake at the same dose? | Did the symptoms occur within 30 days after tramadol prescription? | Did the INR or the bleeding complications remit upon withdrawal of tramadol and/or oral anticoagulants? | In case of oral anticoagulants readministration without tramadol, did the patient remain free of complication? | Total score |
|------------------------------------------------------|-------------------------------------------------------------------------------------------------------|---------------------------------------------------------------|----------------------------------------------------------------------------------------------------|--------------------------------------------------------------------|---------------------------------------------------------------------------------------------------------|----------------------------------------------------------------------------------------------------------------|-------------|
| Abadie et al (2013) [1]                              | Unknown                                                                                               | Unknown                                                       | Unknown                                                                                            | Most of the time                                                   | Unknown                                                                                                 | Unknown                                                                                                        | 1           |
| Adverse Drug Reactions Advisory Committee (2004) [2] | Yes                                                                                                   | Unknown                                                       | Unknown                                                                                            | Yes (at least one case but possibly both < 8 days)                 | Unknown                                                                                                 | Not applicable                                                                                                 | 1.5         |
| Bouvy (1998) [3]                                     | Yes                                                                                                   | Unknown                                                       | Unknown                                                                                            | Yes                                                                | Yes / Unknown                                                                                           | Unknown                                                                                                        | 2.5         |
| Chiffolleau et al (2003) [4]                         | Yes                                                                                                   | Unknown                                                       | Unknown                                                                                            | Yes                                                                | Unknown                                                                                                 | Unknown                                                                                                        | 2           |
| Dong et al (2014) [5]                                | Yes                                                                                                   | Yes                                                           | Yes                                                                                                | Yes                                                                | Yes                                                                                                     | Unknown                                                                                                        | 5           |
| Hedenmalm et al (2004) [6]                           | Yes                                                                                                   | Unknown                                                       | Unknown                                                                                            | Uncertain                                                          | Unknown                                                                                                 | Unknown                                                                                                        | 1           |
| Jensen (1997) [7]                                    | Yes                                                                                                   | Unknown                                                       | Yes                                                                                                | Yes                                                                | Unknown                                                                                                 | Unknown                                                                                                        | 3           |
| Madsen et al (2004) [8]                              | Yes                                                                                                   | Yes                                                           | No                                                                                                 | Yes                                                                | Yes                                                                                                     | Not applicable                                                                                                 | 4           |

| <b>Author (year)</b>          | <b>Did the event match a classical picture of bleeding complications in patients on oral anticoagulants?</b> | <b>Were other possible causes of the clinical picture ruled out?</b> | <b>Did the patient have a previous history of uneventful oral anticoagulants intake at the same dose?</b> | <b>Did the symptoms occur within 30 days after tramadol prescription?</b> | <b>Did the INR or the bleeding complications remit upon withdrawal of tramadol and/or oral anticoagulants?</b> | <b>In case of oral anticoagulants readministration without tramadol, did the patient remain free of complication?</b> | <b>Total score</b> |
|-------------------------------|--------------------------------------------------------------------------------------------------------------|----------------------------------------------------------------------|-----------------------------------------------------------------------------------------------------------|---------------------------------------------------------------------------|----------------------------------------------------------------------------------------------------------------|-----------------------------------------------------------------------------------------------------------------------|--------------------|
| Sabbe et al (1998) [9]        | Yes                                                                                                          | Yes                                                                  | Yes                                                                                                       | Yes                                                                       | Yes                                                                                                            | Yes                                                                                                                   | 6                  |
| Scher et al (1997) [10]       | Yes                                                                                                          | Yes                                                                  | Yes                                                                                                       | Yes                                                                       | Yes                                                                                                            | Yes                                                                                                                   | 6                  |
| Stöllberger et al (2017) [11] | Yes                                                                                                          | No                                                                   | Yes                                                                                                       | Unknown                                                                   | Yes                                                                                                            | Yes                                                                                                                   | 4                  |
| Vacher et al (2020) [12]      | Yes                                                                                                          | Unknown                                                              | Unknown                                                                                                   | Yes                                                                       | Not applicable                                                                                                 | Not applicable                                                                                                        | 2                  |
| Veltri et al (2019) [13]      | Yes                                                                                                          | Yes                                                                  | Yes                                                                                                       | Unknown                                                                   | Yes                                                                                                            | Yes                                                                                                                   | 5                  |

*INR*, international normalized ratio

## Supplementary File 2 Newcastle-Ottawa quality assessment scale used for risk of bias assessment of case-control studies

Note: A study can be awarded a maximum of one star for each numbered item within the Selection and Exposure categories. A maximum of two stars can be given for Comparability.

### Selection

- 1) Is the definition of bleeding patients under anticoagulants adequate?
  - a) yes, with independent validation (2 independent sources or reference to primary records) ★
  - b) yes, eg record linkage or based on self reports
  - c) no description
- 2) Are bleeding patients representative
  - a) consecutive or obviously representative sample of bleeding patients under anticoagulants ★
  - b) potential for selection biases or not stated
- 3) Selection of nonbleeding patients under anticoagulants
  - a) same community as cases ★
  - b) hospital controls
  - c) no description
- 4) Definition of nonbleeding patients under anticoagulants
  - a) no history of bleeding under anticoagulants ★
  - b) no description of source

### Comparability

- 1) Comparability of cases and controls on the basis of the design or analysis
  - a) study controls for age and sex ★
  - b) study controls for any additional factor ★

### Exposure

- 1) Ascertainment of exposure to tramadol
  - a) secure record (eg pharmacy records) ★
  - b) structured interview where blind to case/control status ★
  - c) interview not blinded to case/control status
  - d) written self-report or medical record only
  - e) no description
- 2) Same method of ascertainment for exposure to tramadol for cases and controls
  - a) yes ★
  - b) no
- 3) Missing data on tramadol exposure
  - a) same rate for both groups ★
  - b) non respondents described
  - c) rate different and no designation

**Supplementary Table 4** Risk of bias assessment of included case-control studies

| Author<br>(year)                  | Selection of cases and controls                                  |                                                              |                                                                    |                                                                     | Comparability of cases and controls |                                                    | Ascertainment of exposure                         |                                                     |                                                           | Total stars |
|-----------------------------------|------------------------------------------------------------------|--------------------------------------------------------------|--------------------------------------------------------------------|---------------------------------------------------------------------|-------------------------------------|----------------------------------------------------|---------------------------------------------------|-----------------------------------------------------|-----------------------------------------------------------|-------------|
|                                   | Appropriate definition of bleeding patients under anticoagulants | Representativeness of bleeding patients under anticoagulants | Appropriate selection of nonbleeding patients under anticoagulants | Appropriate definition of nonbleeding patients under anticoagulants | Study controls for age and sex      | Study controls for additional factors <sup>a</sup> | Appropriate ascertainment of exposure to tramadol | Same method of ascertainment for cases and controls | Same rate of missing exposure data for cases and controls |             |
| Burgos-Gonzalez et al (2022) [14] | ★                                                                | ★                                                            | ★                                                                  | ★                                                                   | ★                                   | ★ <sup>b</sup>                                     | ★                                                 | ★                                                   | ★                                                         | 9           |
| Launiainen et al (2010) [15]      | ★                                                                | no                                                           | ★                                                                  | ★                                                                   | no                                  | no                                                 | ★                                                 | ★                                                   | ★                                                         | 6           |

<sup>a</sup> Analyses or design controlling for at least one additional factor: history of gastrointestinal (GI) bleeding, diabetes, atrial fibrillation, chronic heart failure, chronic obstructive pulmonary disease, hypertension, renal impairment, hepatic impairment, stroke, anemia, cancer, alcohol use, NSAIDs, antiplatelet agents

<sup>b</sup> Adjusted for body mass index, smoking status, arterial hypertension, renal and hepatic disorders, prior bleeds, gastrointestinal conditions, other medications (such as acid suppressing drugs, selective serotonin receptor inhibitors, VKAs, and other analgesics such as NSAIDs, codeine, and opioids)

### Supplementary File 3 Newcastle-Ottawa quality assessment scale used for risk of bias assessment of cohort studies

Note: A study can be awarded a maximum of one star for each numbered item within the Selection and Outcome categories. A maximum of two stars can be given for Comparability.

#### Selection

- 1) Representativeness of patients under anticoagulants and exposed to tramadol
  - a) truly representative of patients under anticoagulants exposed to tramadol in the community ★
  - b) somewhat representative of patients under anticoagulants exposed to tramadol in the community ★
  - c) selected group of patients under anticoagulants exposed to tramadol eg nurses, volunteers
  - d) no description of the derivation of the cohort
- 2) Selection of patients under anticoagulants and not exposed to tramadol
  - a) drawn from the same community as the exposed cohort ★
  - b) drawn from a different source
  - c) no description of the derivation of the non-exposed cohort
- 3) Ascertainment of exposure
  - a) secure record (eg pharmacy records) ★
  - b) structured interview ★
  - c) written self report
  - d) no description
- 4) Demonstration that bleeding occurred after exposition to tramadol
  - a) yes ★
  - b) no

#### Comparability

- 1) Comparability of cohorts on the basis of the design or analysis
  - a) study controls for age ★
  - b) study controls for any additional factor ★

#### Outcome

- 1) Assessment of bleeding
  - a) independent blind assessment or reference to primary records ★
  - b) record linkage ★
  - c) self report
  - d) no description
- 2) Was follow-up long enough for outcomes to occur
  - a) yes (over one year) ★
  - b) no
- 3) Adequacy of follow up of cohorts
  - a) complete follow up - all subjects accounted for ★
  - b) subjects lost to follow up unlikely to introduce bias - < 10 % or described ★

c) follow up rate < 90 % and no description of those lost

d) no statement

**Supplementary Table 5** Risk of bias assessment of included cohort studies

| Author<br>(year)                    | Selection of cohorts                                                                      |                                                                        |                                                   |                                                              | Comparability of cohorts       |                                                    | Ascertainment of outcome                         |                             |                                                    | Total stars |
|-------------------------------------|-------------------------------------------------------------------------------------------|------------------------------------------------------------------------|---------------------------------------------------|--------------------------------------------------------------|--------------------------------|----------------------------------------------------|--------------------------------------------------|-----------------------------|----------------------------------------------------|-------------|
|                                     | Exposed patients from a representative source population of patients under anticoagulants | Unexposed patients from the same source population as exposed patients | Appropriate ascertainment of exposure to tramadol | Demonstration that bleeding occurred after tramadol exposure | Study controls for age and sex | Study controls for additional factors <sup>a</sup> | Appropriate assessment of bleeding complications | Follow up at least one year | < 10% or adequate description of lost to follow up |             |
| Penning-van Beest et al (2005) [16] | ★                                                                                         | ★                                                                      | ★                                                 | ★                                                            | ★                              | ★ <sup>b</sup>                                     | ★                                                | ★                           | ★                                                  | 9           |
| Vitry et al (2011) [17]             | ★                                                                                         | ★                                                                      | ★                                                 | ★                                                            | ★                              | ★ <sup>c</sup>                                     | ★                                                | no                          | ★                                                  | 8           |

<sup>a</sup> Analyses or design controlling for at least one additional factor: history of gastrointestinal (GI) bleeding, diabetes, atrial fibrillation, chronic heart failure, chronic obstructive pulmonary disease, hypertension, renal impairment, hepatic impairment, stroke, anemia, cancer, alcohol use, NSAIDs, antiplatelet agents

<sup>b</sup> Adjusted for hypertension and history of GI bleeding

<sup>c</sup> Adjusted for socio-economic index of disadvantage for postcode of residence, number of comorbidities, number of prescribers (annually), number of different pharmacies used (annually), previous bleeding related hospitalisations during the 1-year period before first warfarin prescription, number of different medicines prescribed during the study period (annually), residential status (annually) and if bleeding occurred in the first 2 weeks of warfarin initiation

## References

1. Abadie D, Durrieu G, Roussin A, et al (2013) "Serious" Adverse Drug Reactions with Tramadol: a 2010-2011 Pharmacovigilance Survey in France. *Thérapie* 68:77–84. <https://doi.org/10.2515/therapie/2013021>
2. Adverse Drug Reactions Advisory Committee Tramadol-Warfarin Interaction-ADRAC. *Australian Adverse Drug Reactions Bulletin* 23:16. <https://doi.org/10.3316/informit.563076426255701>
3. Bouvy ML (1998) Possible interaction between tramadol (Tramal®) and coumarins. *Geneesmiddelenbulletin* 32:36–37
4. Chiffolleau A, Veyrac G, Dudouet D, et al (2003) [Tramadol and oral anticoagulants: interaction or confounding factors?]. *Thérapie* 58:471–474. <https://doi.org/10.2515/therapie:2003079>
5. Dong S, Zhang T, Li Y, Zhai S (2014) [Pharmaceutical care of serious bleeding induced by tramadol-warfarin interaction: a case report]. *Beijing Da Xue Xue Bao Yi Xue Ban = Journal of Peking University Health Sciences* 46:809–813
6. Hedenmalm K, Lindh JD, Säwe J, Rane A (2004) Increased liability of tramadol-warfarin interaction in individuals with mutations in the cytochrome P450 2D6 gene. *European Journal of Clinical Pharmacology* 60:369–372. <https://doi.org/10.1007/s00228-004-0783-7>
7. Jensen K (1997) [Interaction between tramadol and oral anticoagulants]. *Ugeskrift for Laeger* 159:785–786
8. Madsen H, Rasmussen JM, Brøsen K (1997) Interaction between tramadol and phenprocoumon. *Lancet (London, England)* 350:637. [https://doi.org/10.1016/S0140-6736\(05\)63325-9](https://doi.org/10.1016/S0140-6736(05)63325-9)
9. Sabbe JR, Sims PJ, Sims MH (1998) Tramadol-warfarin interaction. *Pharmacotherapy* 18:871–873
10. Scher ML, Huntington NH, Vitillo JA (1997) Potential interaction between tramadol and warfarin. *The Annals of Pharmacotherapy* 31:646–647. <https://doi.org/10.1177/106002809703100523>
11. Stöllberger C, Heger M, Finsterer J (2017) Hemopericardium under dabigatran for stroke prevention in atrial fibrillation. *Blood Coagulation & Fibrinolysis: An International Journal in Haemostasis and Thrombosis* 28:185–188. <https://doi.org/10.1097/MBC.0000000000000553>
12. Vacher R, Bourneau-Martin D, Babin M, et al (2019) Identification of self-medication drugs involved in drug interactions and adverse effects in the French national pharmacovigilance database. *Fundamental and Clinical Pharmacology* 33:62. <https://doi.org/10.1111/fcp.12470>



13. Veltri KT, Olsufka WA (2019) Bleeding and Elevated INR Secondary to Concomitant Tramadol and Warfarin Administration. *P & T: A Peer-Reviewed Journal for Formulary Management* 44:546–548
14. Burgos-Gonzalez A de, Huerta C, Peñalver MJ, et al (2022) Effect of tramadol and DOACs with special attention to dabigatran on concomitant use, on the risk of mayor bleeding using BIFAP database in Spain. *Pharmacoepidemiol Drug Saf.* <https://doi.org/10.1002/pds.5525>
15. Launiainen T, Sajantila A, Rasanen I, et al (2010) Adverse interaction of warfarin and paracetamol: evidence from a post-mortem study. *European Journal of Clinical Pharmacology* 66:97–103. <https://doi.org/10.1007/s00228-009-0727-3>
16. Penning-van Beest F, Erkens J, Petersen K-U, et al (2005) Main comedications associated with major bleeding during anticoagulant therapy with coumarins. *European Journal of Clinical Pharmacology* 61:439–444. <https://doi.org/10.1007/s00228-005-0947-0>
17. Vitry AI, Roughead EE, Ramsay EN, et al (2011) Major bleeding risk associated with warfarin and co-medications in the elderly population. *Pharmacoepidemiology and Drug Safety* 20:1057–1063. <https://doi.org/10.1002/pds.2219>
